# Supplementary material
Source: publisher figshare collection journal article supplement (https://tandf.figshare.com/ndownloader/files/21301035)

**Supplementary Figure 1-a:** Overall survival curve for patients grouped according to existence of end-stage renal disease (ESRD).


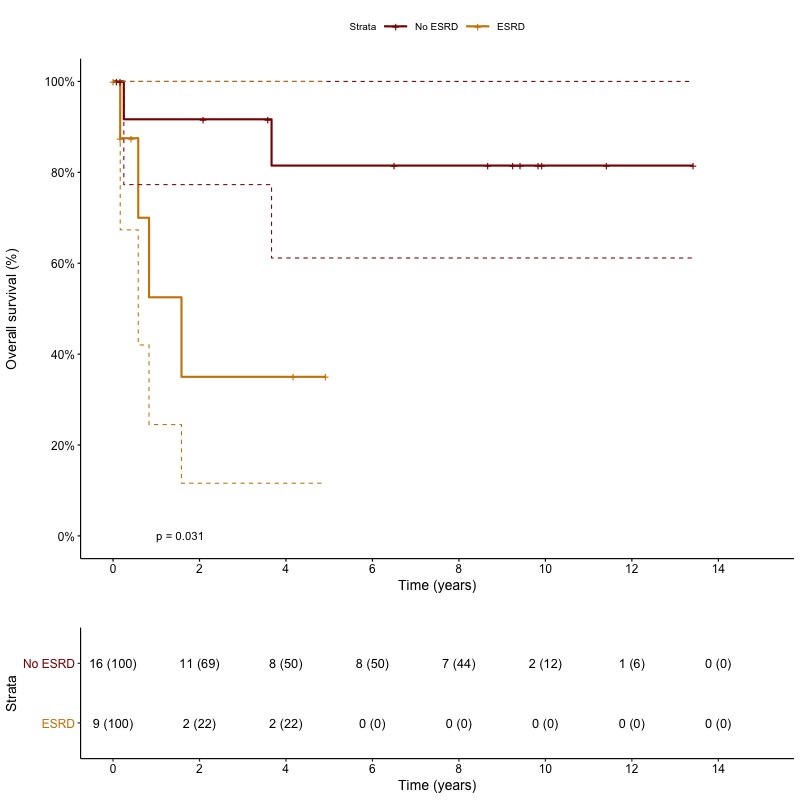


**Supplementary Figure 1-b:** Overall survival for patients grouped according to highest pT-stage of bladder cancer.


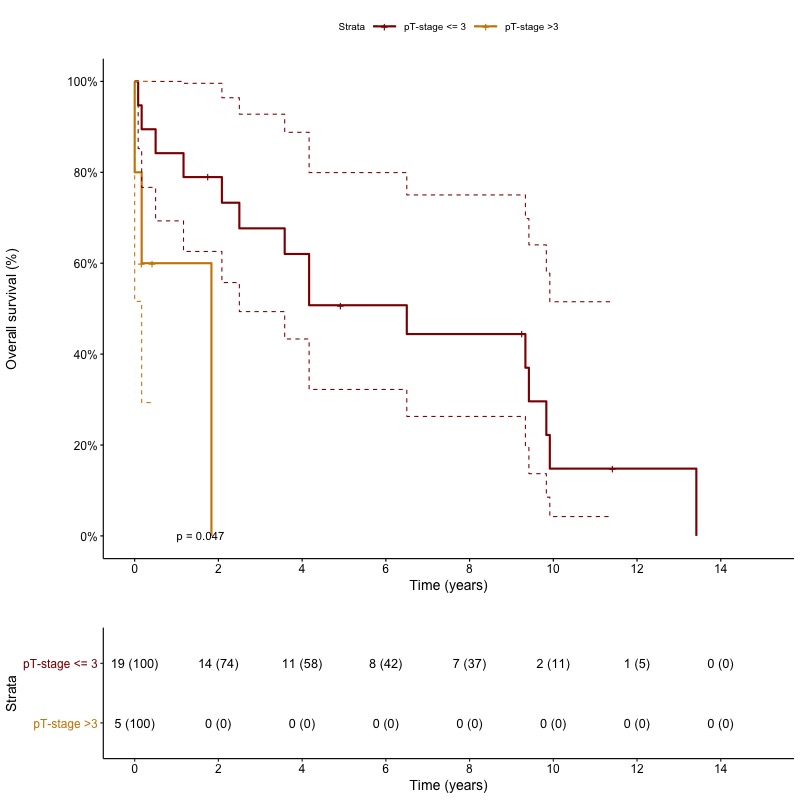


**Supplementary Figure 1-c:** Cancer-specific survival for patients grouped according to highest pT-stage of bladder cancer.


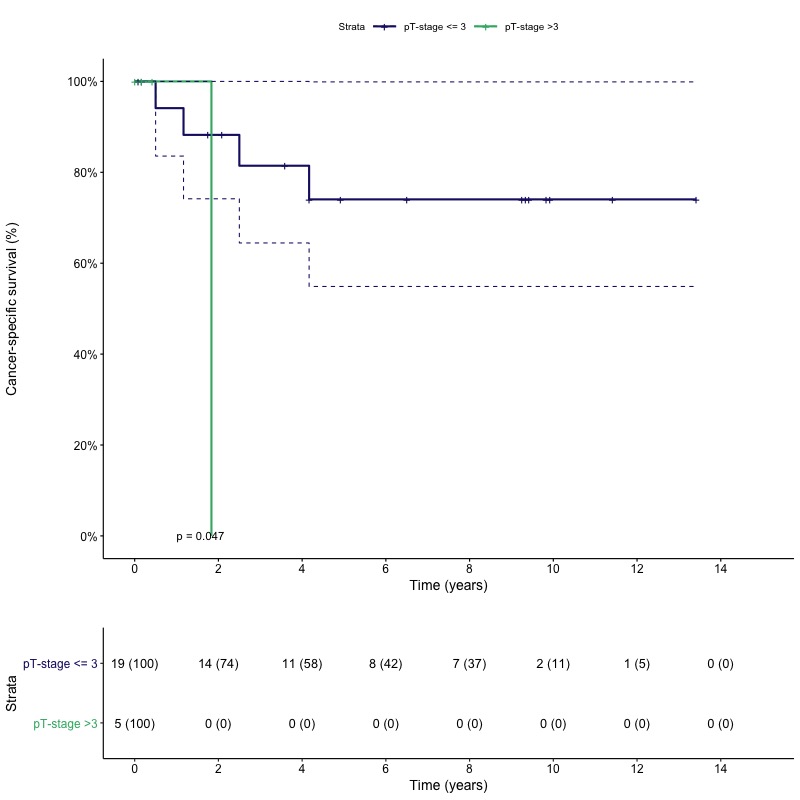

Supplement: Supplementary file 1 [file 21301035]
